# Supplementary material
Source: PubMed Central journal article supplement (PMC2874452)
Supplement: supp_181_10_1106__1.pdf [file supp_181_10_1106__1.pdf]

## **Simvastatin as a Treatment for Pulmonary Hypertension Trial (SiPHT)**

Martin R. Wilkins, Omar Ali, William Bradlow, John Wharton, Anne Taegtmeyer, Christopher J. Rhodes, Hossein A. Ghofrani, Luke Howard, Petros Nihoyannopoulos, Raad H. Mohiaddin, J. Simon R. Gibbs for the SiPHT Study Group

### **Online Data Supplement**

Table E1 - Plasma cytokines and growth factors

| pg/ml            | Placebo W0 |        | Placebo W24 |       | Sig. | Statin W0 |        | Statin W24 |       | Sig. |
|------------------|------------|--------|-------------|-------|------|-----------|--------|------------|-------|------|
|                  | Mean       | SEM    | Mean        | SEM   |      | Mean      | SEM    | Mean       | SEM   |      |
| Hu IL-1b         | 2.6        | .8     | 2.3         | .6    | 0.68 | 1.8       | .4     | 1.7        | .4    | 0.77 |
| Hu IL-1ra        | 297.8      | 94.2   | 237.7       | 49.8  | 0.44 | 113.3     | 19.6   | 139.1      | 35.4  | 0.48 |
| Hu IL-2          | 6.9        | 1.6    | 5.4         | 1.5   | 0.64 | 4.2       | 1.7    | 4.7        | 1.3   | 0.79 |
| Hu IL-4          | 2.4        | .3     | 2.4         | .3    | 0.39 | 1.8       | .5     | 2.0        | .3    | 0.61 |
| Hu IL-5          | 1.7        | .3     | 1.6         | .4    | 0.85 | 1.2       | .3     | 1.1        | .2    | 0.94 |
| Hu IL-6          | 16.6       | 5.5    | 15.1        | 5.2   | 0.67 | 8.6       | 2.4    | 8.7        | 2.2   | 0.94 |
| Hu IL-7          | 4.6        | .9     | 3.6         | .5    | 0.72 | 5.4       | 1.4    | 3.7        | .7    | 0.13 |
| Hu IL-8          | 7.2        | 1.4    | 6.1         | 1.2   | 0.79 | 5.2       | 1.5    | 4.3        | .9    | 0.48 |
| Hu IL-9          | 48.1       | 10.6   | 36.3        | 6.7   | 0.24 | 51.2      | 11.9   | 87.1       | 42.8  | 0.42 |
| Hu IL-10         | 10.2       | 2.0    | 11.5        | 3.2   | 0.47 | 23.6      | 13.7   | 15.7       | 9.6   | 0.16 |
| Hu IL-12(p70)    | 32.0       | 3.7    | 27.5        | 3.7   | 0.26 | 36.9      | 7.7    | 36.1       | 6.9   | 0.87 |
| Hu IL-13         | 5.8        | .9     | 5.7         | 1.2   | 0.81 | 12.4      | 5.5    | 10.6       | 4.9   | 0.11 |
| Hu IL-15         | 15.8       | 4.0    | 13.8        | 3.9   | 0.69 | 11.9      | 2.2    | 13.4       | 2.4   | 0.44 |
| Hu IL-17         | 88.0       | 27.7   | 58.7        | 7.6   | 0.79 | 67.1      | 18.5   | 57.3       | 13.4  | 0.51 |
| Hu Eotaxin       | 94.0       | 19.5   | 82.0        | 11.5  | 0.35 | 71.7      | 8.9    | 69.3       | 8.0   | 0.78 |
| Hu FGF basic     | 20.8       | 7.3    | 20.7        | 7.0   | 0.80 | 24.8      | 8.3    | 20.8       | 6.6   | 0.56 |
| Hu G-CSF         | 29.6       | 4.4    | 26.8        | 4.3   | 0.14 | 30.6      | 5.3    | 27.3       | 4.3   | 0.22 |
| Hu GM-CSF        | 83.2       | 12.0   | 78.3        | 10.8  | 0.87 | 67.0      | 13.5   | 72.1       | 11.0  | 0.71 |
| Hu IFN- $\gamma$ | 319.4      | 113.9  | 247.3       | 58.7  | 0.42 | 122.1     | 47.7   | 115.9      | 18.3  | 0.88 |
| Hu IP-10         | 2018.5     | 474.5  | 1848.1      | 554.0 | 0.73 | 1284.7    | 236.5  | 1337.8     | 324.5 | 0.79 |
| Hu MCP-1         | 33.5       | 4.6    | 25.6        | 3.3   | 0.09 | 33.3      | 5.8    | 27.4       | 2.3   | 0.32 |
| Hu MIP-1a        | 15.5       | 5.3    | 7.5         | 3.3   | 0.09 | 8.1       | 3.9    | 4.4        | 2.0   | 0.34 |
| Hu MIP-1b        | 88.1       | 8.0    | 83.1        | 8.4   | 0.76 | 312.7     | 236.8  | 384.1      | 307.6 | 0.33 |
| Hu PDGF bb       | 2896.8     | 472.2  | 2734.2      | 329.8 | 0.58 | 3306.7    | 1502.4 | 2530.8     | 538.3 | 0.65 |
| Hu RANTES        | 2553.4     | 1192.8 | 1635.1      | 175.9 | 0.08 | 3138.6    | 1292.2 | 1577.4     | 110.9 | 0.25 |
| Hu TNF- $\alpha$ | 73.9       | 12.4   | 75.7        | 8.6   | 0.11 | 96.7      | 20.0   | 80.9       | 17.1  | 0.36 |
| Hu VEGF          | 50.4       | 10.9   | 40.9        | 4.8   | 0.99 | 51.8      | 15.2   | 35.0       | 5.3   | 0.30 |

Data are presented as mean  $\pm$  SEM for plasma concentrations (picograms per millilitre) at baseline

(W0) and 6 months (W24) in patients receiving placebo or simvastatin. Statistics shown are paired t-

tests. Hu, human; IL, interleukin; IL-1ra, IL-1 receptor antagonist; MCP-1 monocyte chemoattractant protein 1; MIP-1 $\beta$ , macrophage inflammatory protein 1 $\beta$ ; MIP-1 $\alpha$ , macrophage inflammatory protein 1 $\alpha$ ; RANTES, regulated on activation, normal T-cell expressed and secreted; IFN- $\gamma$ , interferon- $\gamma$ , G-CSF, granulocyte-colony stimulating factor; GM-CSF, granulocyte macrophage-colony stimulating factor ; FGF basic, fibroblast growth factor basic; IP-10, interferon-inducible protein 10; TNF- $\alpha$ , tumour necrosis factor- $\alpha$ ; PDGFbb, platelet-derived growth factor bb; VEGF, vascular endothelial growth factor.

Plasma cytokines and growth factors were measured using a Bio-Plex Human Group I 27-plex Panel, with a detection range of 1.95-32,000 pg/ml (171-A11127; Bio-Rad Laboratories Ltd, Hemel Hempstead, Herts, UK).

No significant differences in circulating cytokines and growth factors were observed over the 6 month period, in either group. Nonetheless, when compared with independent data from subjects with no known cardiovascular disease(1) it is apparent that the circulating levels of several cytokines and growth factors were raised in the patients who took part in this study. These include factors that are implicated in the pathophysiology of PAH, such as RANTES, PDGFbb, TNF- $\alpha$  and VEGF (2), as well as other cytokines.

## Reference List

1. Huffman, K. M., C. A. Slentz, C. W. Bales, J. A. Houmard, and W. E. Kraus. Relationships between adipose tissue and cytokine responses to a randomized controlled exercise training intervention. *Metabolism* 2008;57:577-583.
2. Hassoun, P. M., L. Mouthon, J. A. Barbera, S. Eddahibi, S. C. Flores, F. Grimminger, P. L. Jones, M. L. Maitland, E. D. Michelakis, N. W. Morrell, et al. Inflammation, growth factors, and pulmonary vascular remodeling. *J Am Coll Cardiol* 2009;54:S10-S19.
